# Supplementary material
Source: publisher figshare collection journal article supplement (https://acs.figshare.com/ndownloader/files/4053241)

## Supporting Information

### **Sr<sub>2</sub>FeO<sub>3</sub> with Stacked Infinite Chains of FeO<sub>4</sub> Square Planes**

Cédric Tassel,<sup>†,‡</sup> Liis Seinberg,<sup>†</sup> Naoaki Hayashi,<sup>‡</sup> Yoshitami Ajiro,<sup>§</sup> Yoji Kobayashi,<sup>†</sup>  
Hiroshi Kageyama<sup>\*,†,||,⊥</sup>

<sup>†</sup> Department of Energy and Hydrocarbon Chemistry, Graduate School of Engineering, Kyoto University,  
Kyoto 615-8510, Japan

<sup>‡</sup> The Hakubi Center for Advanced Research, Kyoto University, Yoshida-Ushinomiya-cho, Sakyo-ku,  
Kyoto 606-8302, Japan

<sup>§</sup> Graduate School of Human and Environmental Studies, Kyoto University, Kyoto 606-8501, Japan

<sup>||</sup> Institute for Integrated Cell-Material Sciences, Kyoto University, Kyoto 606-8501, Japan

<sup>⊥</sup> CREST, Japan Science and Technology Agency (JST), Kawaguchi Center Building 4-1-8, Honcho,  
Kawaguchi, Saitama 332-0012, Japan

#### **FIGURE S1. Laboratory x-ray powder diffraction pattern of Sr<sub>2</sub>FeO<sub>4</sub> and Sr<sub>2</sub>FeO<sub>3</sub>**

The red and blue curves represent the Sr<sub>2</sub>FeO<sub>4</sub> and Sr<sub>2</sub>FeO<sub>3</sub> data, respectively. The black triangle, square and circles indicate peaks of SrCO<sub>3</sub>, CaH<sub>2</sub> and CaO, respectively.

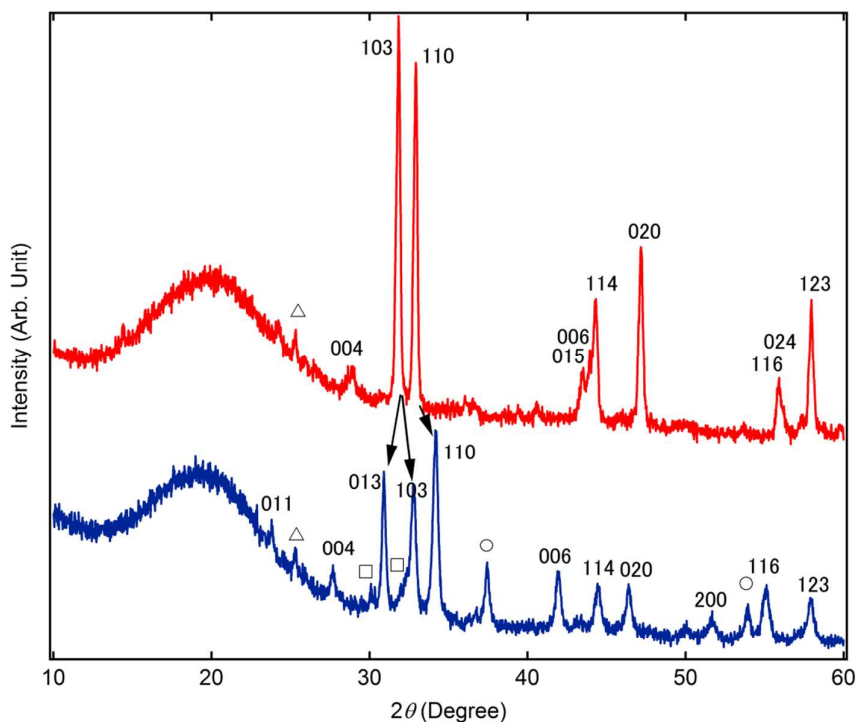

**FIGURE S2. Split view of the patterns of the different phases for the synchrotron x-ray powder diffraction at room temperature.**

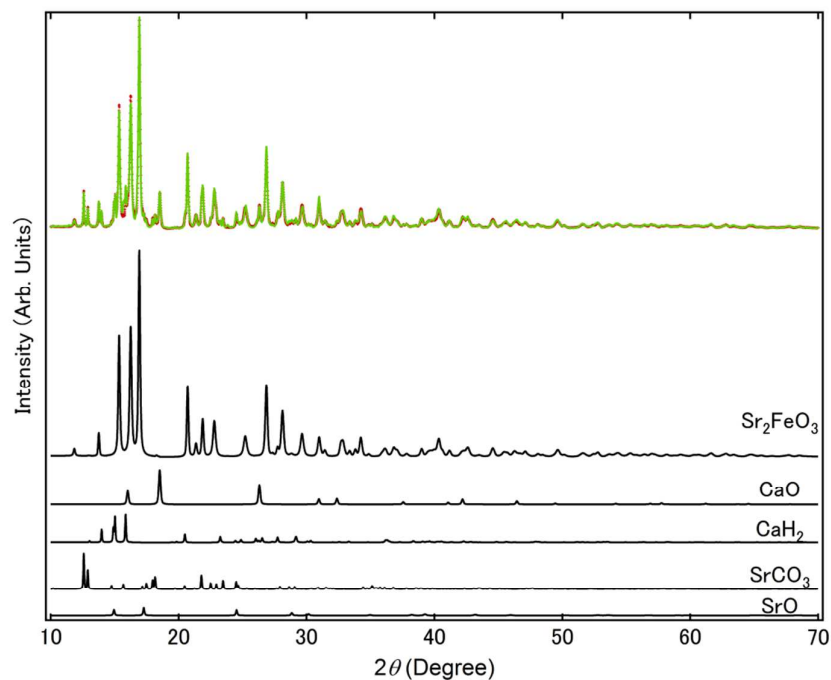

**FIGURE S3. Split view of the patterns of the different phases for the Neutron powder diffraction at 9 K.**

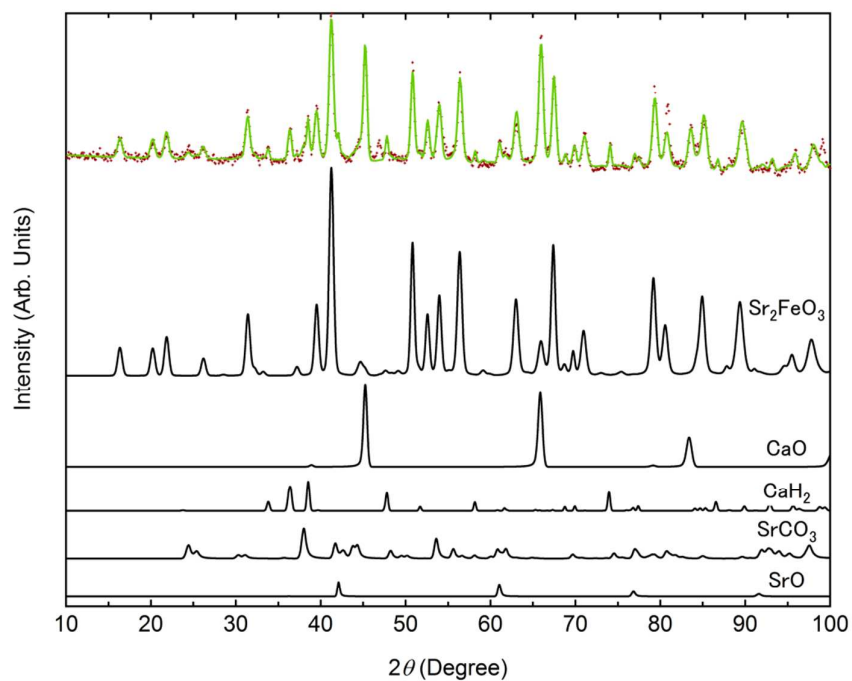

**TABLE S1. Selected Full Width at Half Maximum (FWHM) of several peaks of  $\text{Sr}_2\text{FeO}_3$  from SXRD.**

The position and FWHM of the peaks were determined using a Voigt profile.

|     | Position $2\theta$ (°) | FWHM (°) |
|-----|------------------------|----------|
| 011 | 11.84                  | 0.168    |
| 013 | 15.35                  | 0.146    |
| 103 | 16.25                  | 0.177    |
| 110 | 16.92                  | 0.159    |
| 002 | 6.86                   | 0.084    |
| 004 | 13.75                  | 0.107    |
| 006 | 20.7                   | 0.139    |

**FIGURE S4. Neutron powder diffraction: Evolution of the magnetic peaks of  $\text{Sr}_2\text{FeO}_3$  against temperature.**

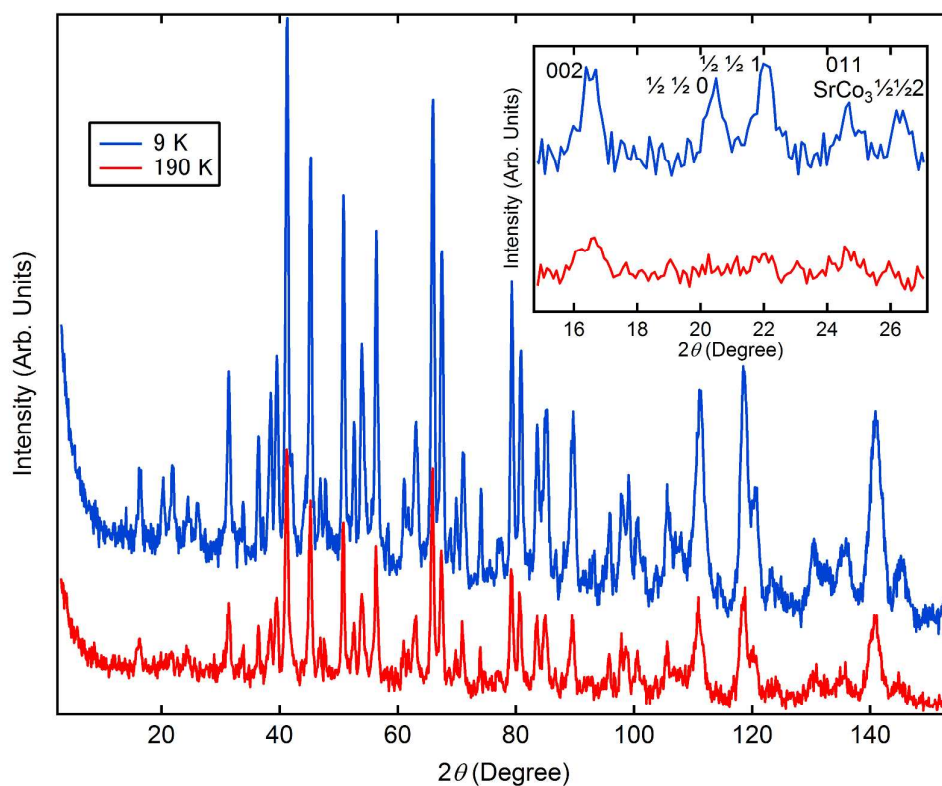

**FIGURE S5. Partial representation of the spin arrangement of  $\text{Sr}_2\text{FeO}_3$ . The 4 spins of one  $ab$  plane and 1 spin of the adjacent plane.**

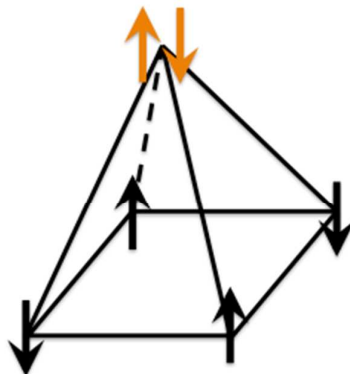

Supplement: Supplementary file 1 [file 4053241]
